# Supplementary material
Source: Springer Nature journal article supplement (https://www.springermedizin.de/resource/supplementary/12961_2014_350_MOESM3_ESM.pdf/9571118)

**Problem stream:** Identification & definition

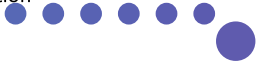

**Policy stream:** Formation and refinement of ideas

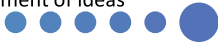

**Politics stream:** context, changes within government, pressure group campaigns public mood.

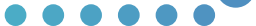

Policy Window

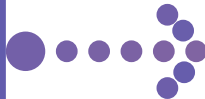

Agenda

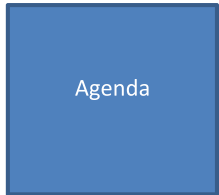

Supplement: MOESM3 [file 9571118]
